# Supplementary material for: Exploring the effect of the axial ligands on the anticancer activity of [C,N,N′] Pt(iv) cyclometallated compounds
Source: Royal Society of Chemistry journal article supplement (doi:10.1039/d4dt01225a), 2024-01-01
Supplement: d4dt01225a1.pdf [file d4dt01225a1.pdf]

## Supporting Information

### Exploring the effect of the axial ligands on the anticancer activity of [C,N,N'] Pt(IV) cyclometallated compounds

Ariadna Lázaro,<sup>a,b</sup> Ramón Bosque,<sup>a</sup> Silvia Marín,<sup>\*c,d,f</sup> Raúl Pérez-León,<sup>d</sup> Josefa Badia,<sup>c,e</sup>

Laura Baldomà,<sup>c,e</sup> Laura Rodríguez,<sup>a,b</sup> Margarita Crespo,<sup>\*a,c</sup> Marta Cascante.<sup>c,d,f</sup>

<sup>a</sup> *Departament de Química Inorgànica i Orgànica, Secció de Química Inorgànica, Facultat de Química, Universitat de Barcelona, E-08028-Barcelona, Spain.*

<sup>b</sup> *Institut de Nanociència i Nanotecnologia (IN2UB), Universitat de Barcelona, E-08028 Barcelona, Spain*

<sup>c</sup> *Institut de Biomedicina de la Universitat de Barcelona (IBUB), Universitat de Barcelona, E-08028 Barcelona, Spain.*

<sup>d</sup> *Departament de Bioquímica i Biomedicina molecular, Facultat de Biologia, Universitat de Barcelona, E-08028-Barcelona, Spain.*

<sup>e</sup> *Departament de Bioquímica i Fisiologia, Secció de Bioquímica i Biologia Molecular, Facultat de Farmàcia, E-08028-Barcelona, Spain.*

<sup>f</sup> *Centro de Investigación Biomédica en Red de Enfermedades Hepáticas y digestivas (CIBEREHD), Instituto de Salud Carlos III (ISCIII), Madrid, Spain.*

\*Corresponding authors: Margarita Crespo ([margarita.crespo@qi.ub.es](mailto:margarita.crespo@qi.ub.es)), Silvia Marín ([silviamarin@ub.edu](mailto:silviamarin@ub.edu)).

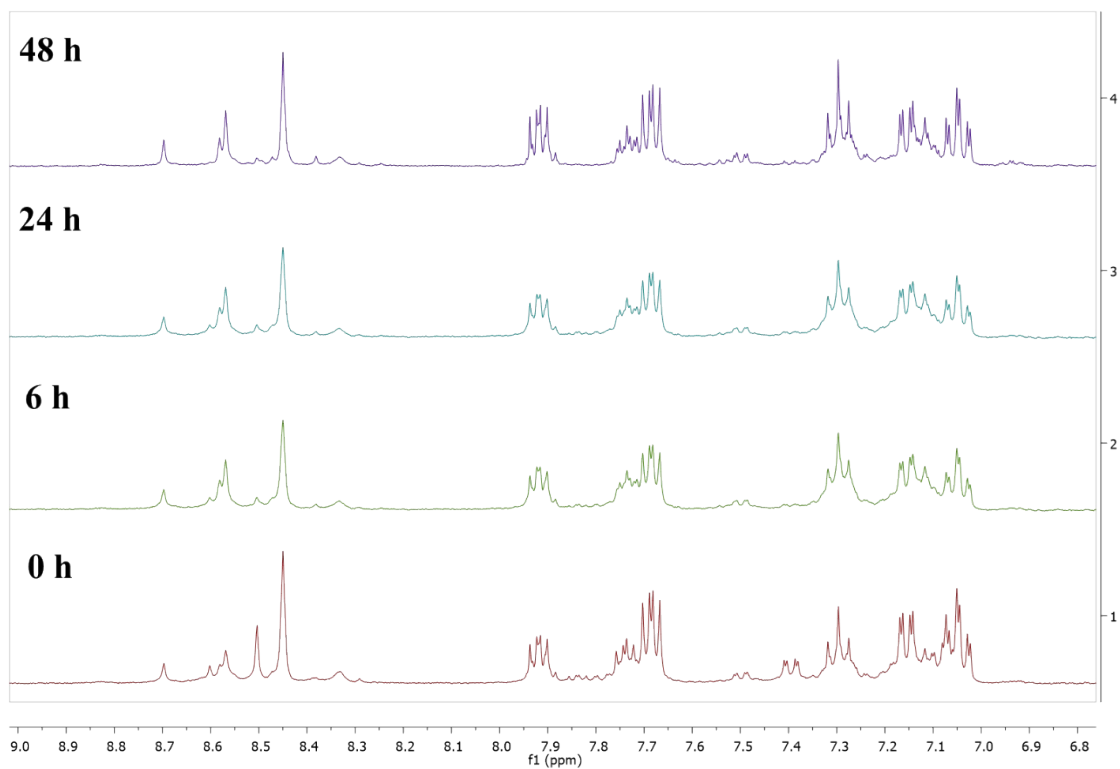

**Figure S1.** Partial view of  $^1\text{H}$  NMR spectrum of compound **2** in a DMSO/ $\text{D}_2\text{O}$  mixture freshly prepared and after 6 h, 24 h and 48 h of storage at 298 K.

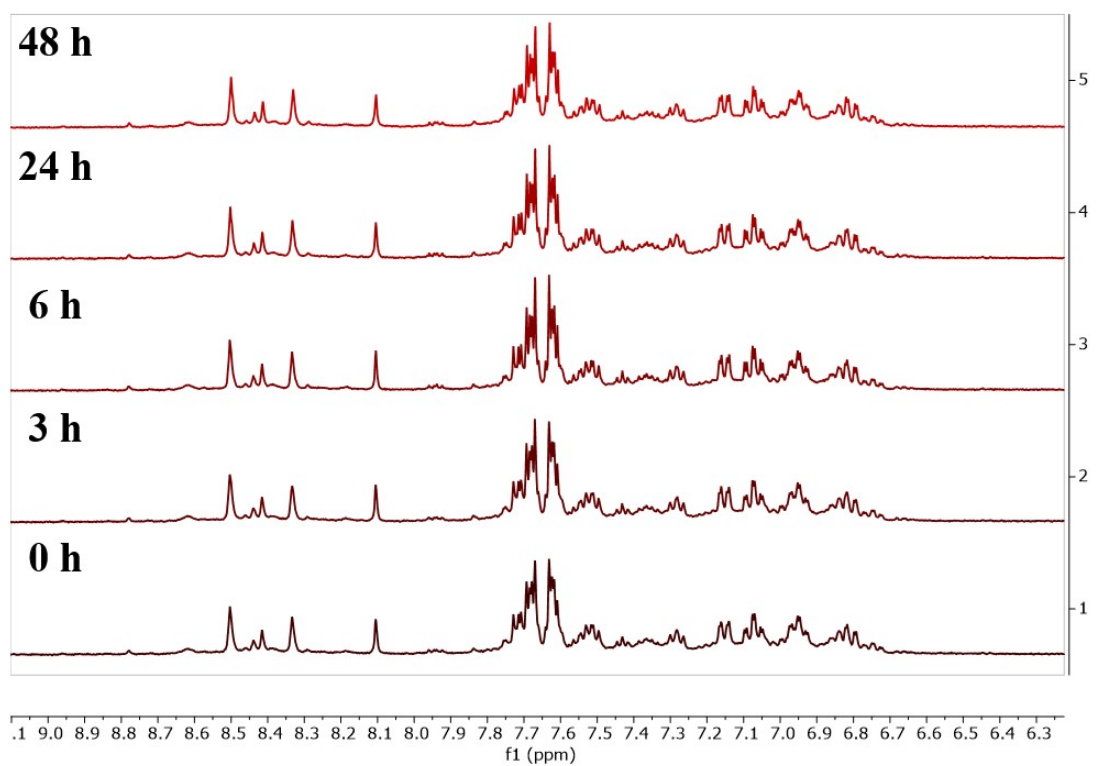

**Figure S2.** Partial view of  $^1\text{H}$  NMR spectrum of compound **3** in a DMSO/ $\text{D}_2\text{O}$  mixture freshly prepared and after 3h, 6h, 24 h and 48 h of storage at 298 K.

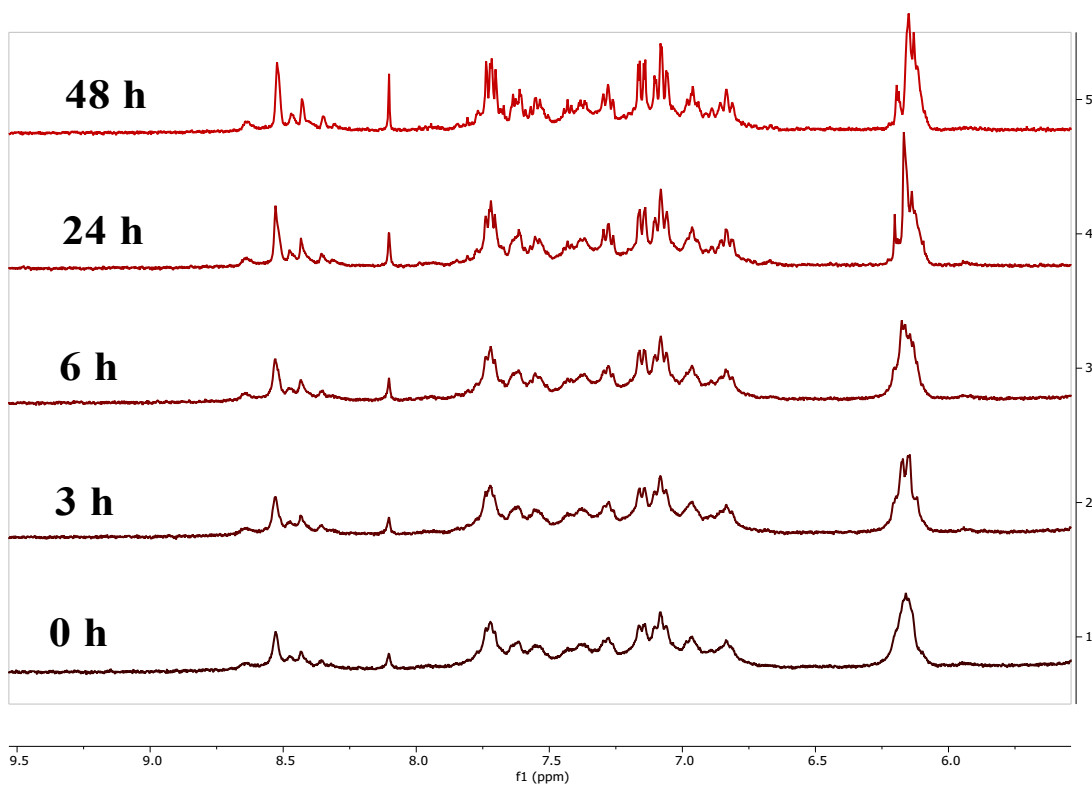

**Figure S3.** Partial view of <sup>1</sup>H NMR spectrum of compound 4 in a DMSO/D<sub>2</sub>O mixture freshly prepared and after 3h, 6h, 24 h and 48 h of storage at 298 K.

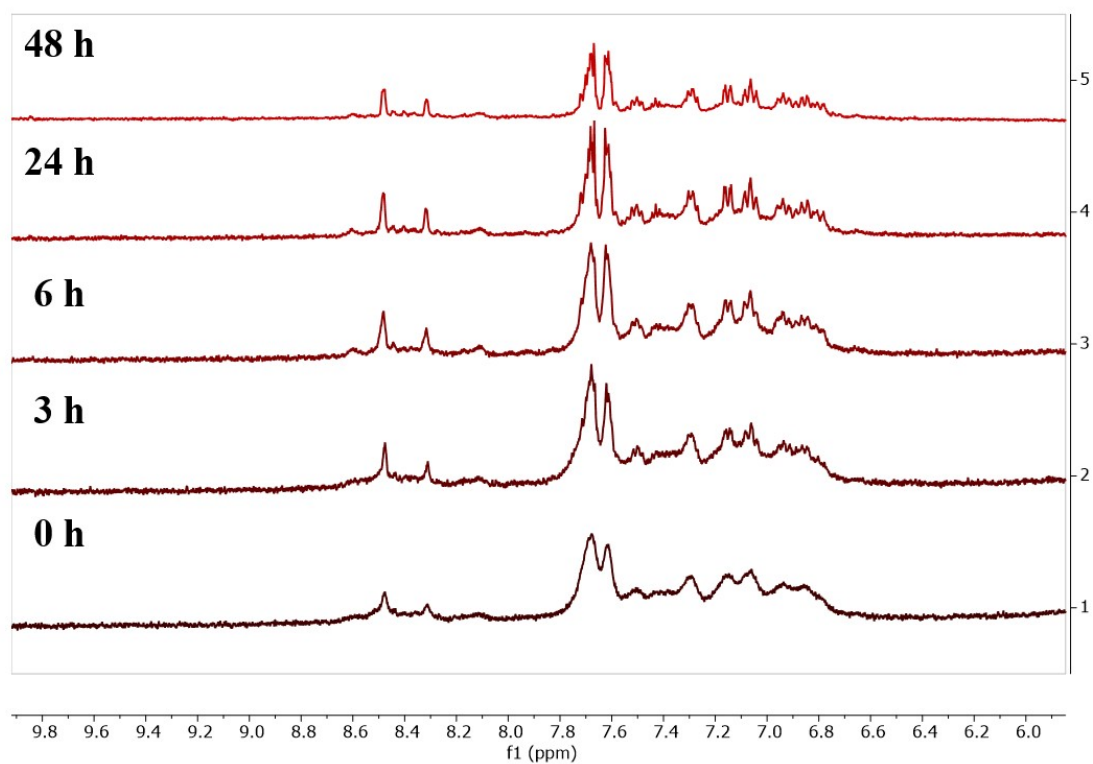

**Figure S4.** Partial view of  $^1\text{H}$  NMR spectrum of compound **5** in a DMSO/ $\text{D}_2\text{O}$  mixture freshly prepared and after 24 h and 48 h of storage at 298 K.

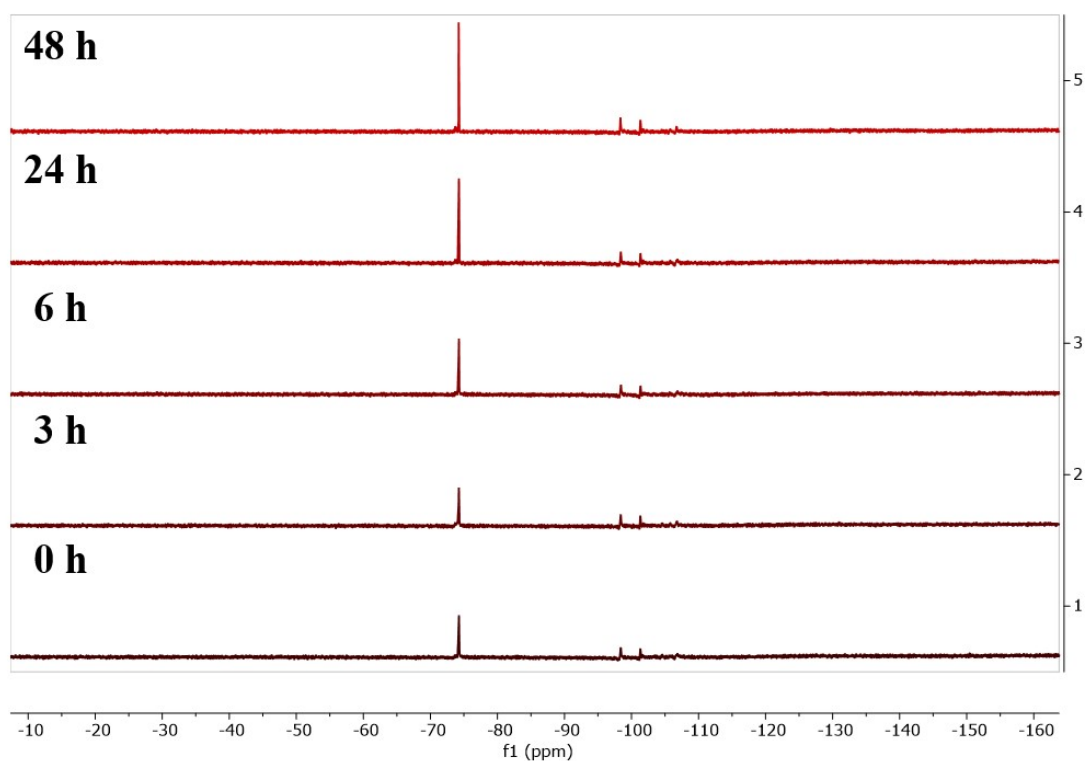

**Figure S5.** Partial view of  $^{19}\text{F}$  NMR spectrum of compound **5** in a DMSO/ $\text{D}_2\text{O}$  mixture freshly prepared and after 24 h and 48 h of storage at 298 K.

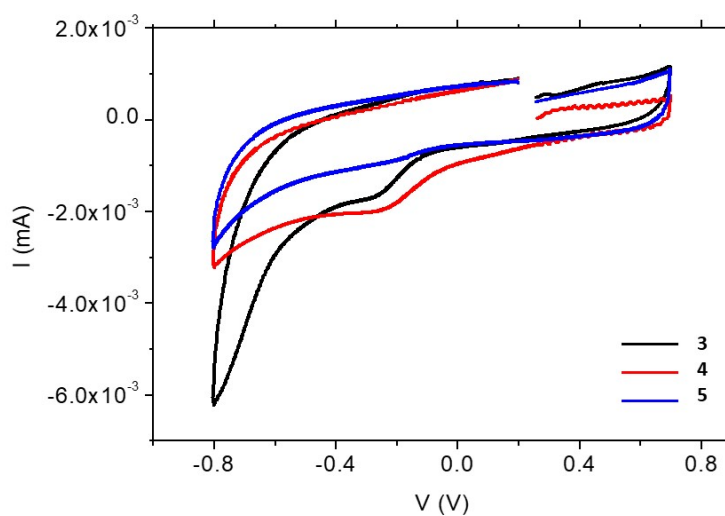

**Figure S6.** First cycle of the cyclic voltammogram of compounds **3**, **4** and **5** in a dimethyl sulfoxide/water (1:1) solution at a scan rate of 100 mV/s.

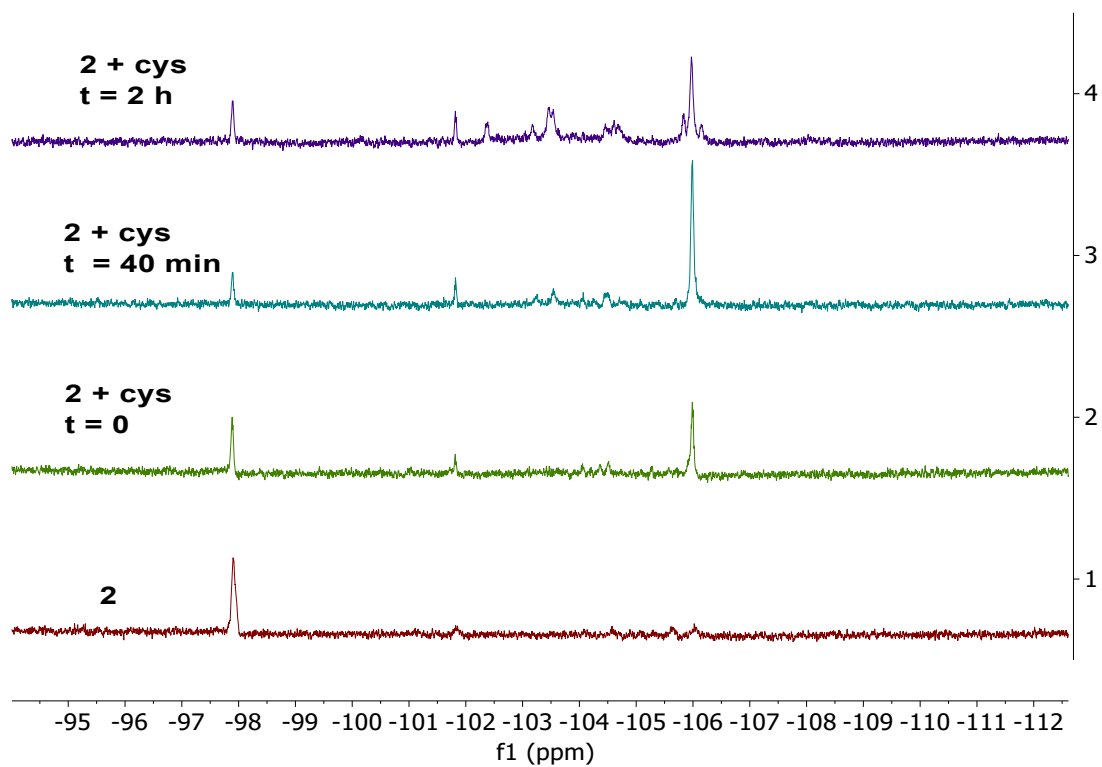

**Figure S7.** Partial view of  $^{19}\text{F}$  NMR spectrum of compound **2** in a DMSO/ $\text{D}_2\text{O}$  mixture and upon addition of L-cysteine at different reaction times at 298 K.

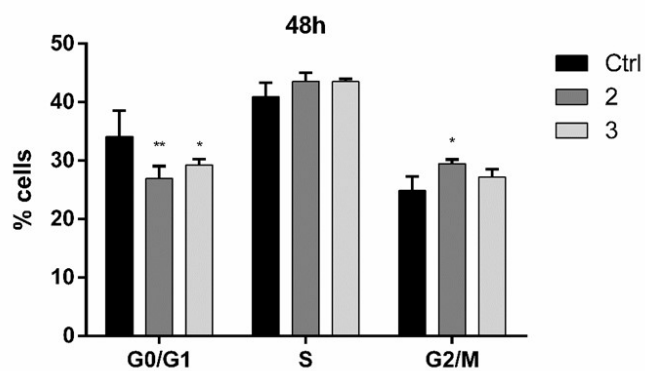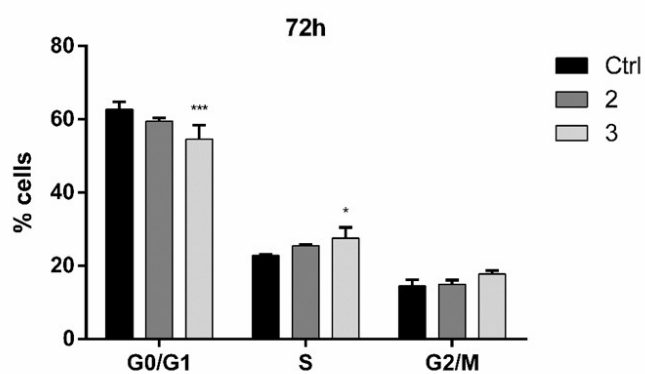

**Figure S8.** Cell cycle phase distribution at 48 and 72 h incubation with compounds **2** and **3** at their IC<sub>50</sub> concentration in HCT116 CRC cell line. Mean ± standard deviation are shown. Two-way ANOVA was used to evaluate significance between treated and control cells, \* p<0.05, \*\* p<0.01, \*\*\* p<0.001.

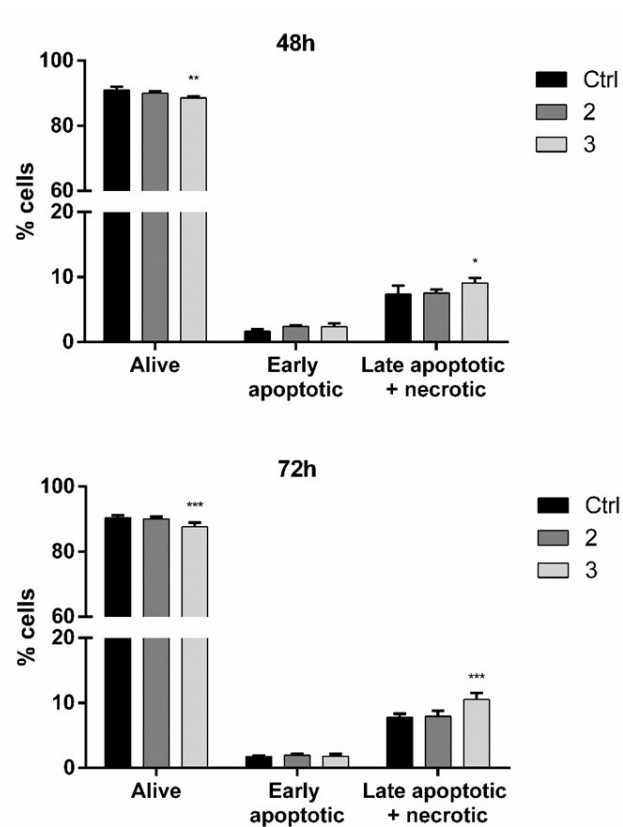

**Figure S9.** Percentage variations of alive, early apoptotic and late apoptotic/necrotic cell populations at 48 and 72 h incubation with compounds **2** and **3** at their IC<sub>50</sub> concentration in HCT116 CRC cell line. Mean ± standard deviation are shown. Two-way ANOVA was used to evaluate significance between treated and control cells, \* p<0.05, \*\* p<0.01, \*\*\* p<0.001.

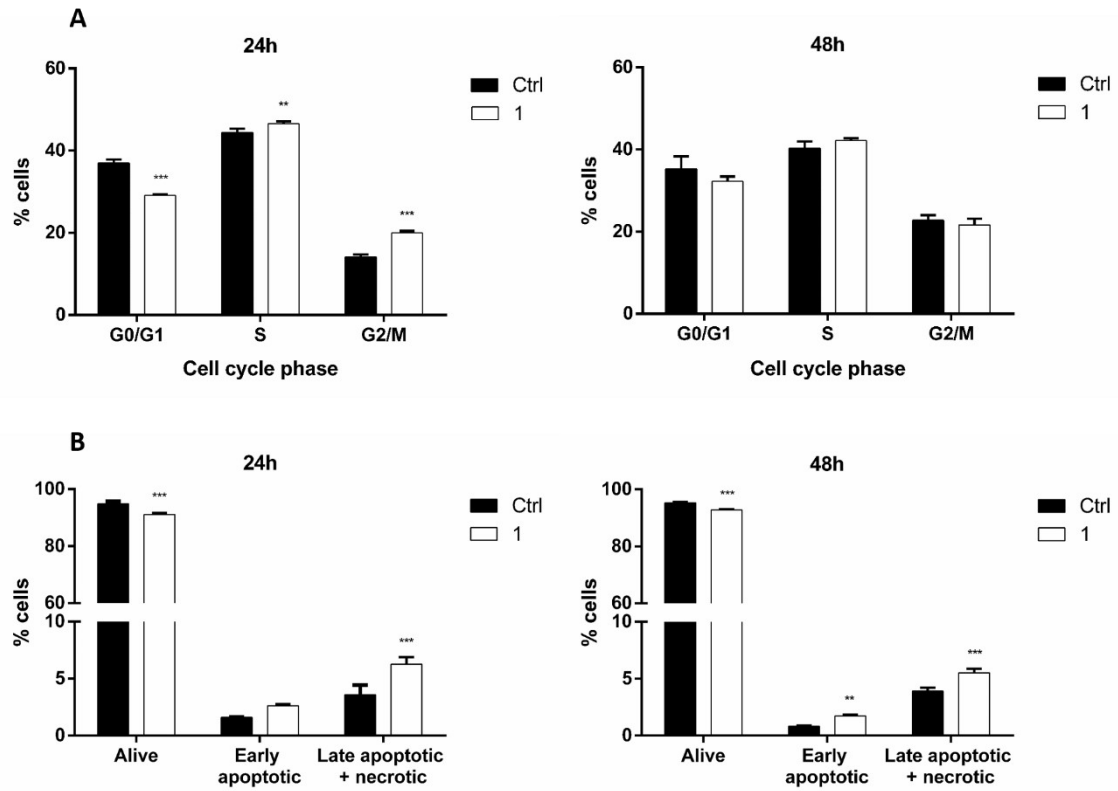

**Figure S10.** A) Cell cycle phase distribution at 24 and 48 h incubation with compound **1** at its IC<sub>50</sub> concentration in HCT116 CRC cell line. B) Percentage variations of alive, early apoptotic and late apoptotic/necrotic cell populations at 24 and 48 h incubation with compound **1** at its IC<sub>50</sub> concentration in HCT116 CRC cell line. Mean ± standard deviation are shown. Two-way ANOVA was used to evaluate significance between treated and control cells, \* p<0.05, \*\* p<0.01, \*\*\* p<0.001.



Table S1. Optimised coordinates of compounds **1-5** and  $X(H_2O)_3^-$  anions

**1**

30

|    |           |           |           |
|----|-----------|-----------|-----------|
| H  | 2.799148  | 0.110864  | -3.481120 |
| C  | 2.944685  | 0.047839  | -2.405782 |
| C  | 3.289696  | -0.122664 | 0.388104  |
| C  | 1.838500  | 0.018554  | -1.544465 |
| C  | 4.233302  | -0.006126 | -1.879880 |
| C  | 4.368512  | -0.091174 | -0.496394 |
| C  | 1.991662  | -0.064585 | -0.120808 |
| H  | 5.115046  | 0.015367  | -2.511052 |
| H  | 3.483315  | -0.187964 | 1.453952  |
| F  | 5.618650  | -0.142080 | 0.019357  |
| C  | 0.466142  | 0.050357  | -2.002065 |
| H  | 0.183734  | 0.091597  | -3.053836 |
| N  | -0.437539 | 0.009398  | -1.073468 |
| Pt | 0.207241  | -0.050279 | 0.812405  |
| N  | -2.000291 | 0.056381  | 1.241332  |
| C  | -2.551368 | 0.598220  | -0.045975 |
| H  | -2.346559 | 1.672042  | -0.054449 |
| H  | -3.638985 | 0.453228  | -0.081054 |
| C  | -1.888812 | -0.045446 | -1.265634 |
| H  | -2.181931 | -1.096993 | -1.366116 |
| H  | -2.181199 | 0.479502  | -2.181057 |
| Cl | 0.982317  | -0.141871 | 3.089490  |
| C  | -2.543531 | -1.296228 | 1.524237  |
| H  | -2.287558 | -1.980650 | 0.713707  |
| H  | -3.636443 | -1.255730 | 1.633524  |
| H  | -2.100582 | -1.667118 | 2.450861  |
| C  | -2.367576 | 0.967530  | 2.351748  |
| H  | -1.945918 | 0.579398  | 3.280134  |
| H  | -3.459933 | 1.039043  | 2.445572  |
| H  | -1.953726 | 1.959588  | 2.158732  |

|    |           |           |           |
|----|-----------|-----------|-----------|
| H  | 2.797378  | 0.126628  | -3.540774 |
| C  | 2.947672  | 0.064648  | -2.466798 |
| C  | 3.306177  | -0.108434 | 0.334310  |
| C  | 1.841006  | 0.031915  | -1.602946 |
| C  | 4.234415  | 0.012967  | -1.942284 |
| C  | 4.381489  | -0.072877 | -0.559951 |
| C  | 2.031759  | -0.052169 | -0.197340 |
| H  | 5.113192  | 0.036306  | -2.576849 |
| H  | 3.492151  | -0.173507 | 1.400302  |
| F  | 5.626339  | -0.120042 | -0.051445 |
| C  | 0.467877  | 0.056413  | -2.049860 |
| H  | 0.186506  | 0.098818  | -3.101601 |
| N  | -0.443378 | 0.008970  | -1.134535 |
| Pt | 0.234516  | -0.057665 | 0.762426  |
| N  | -2.054236 | 0.041568  | 1.205169  |
| C  | -2.569118 | 0.589289  | -0.094400 |
| H  | -2.357108 | 1.660017  | -0.103870 |
| H  | -3.655618 | 0.450435  | -0.154076 |
| C  | -1.897666 | -0.069906 | -1.300202 |
| H  | -2.166843 | -1.128742 | -1.378840 |
| H  | -2.193999 | 0.433070  | -2.225940 |
| Cl | 1.015978  | -0.141058 | 3.043862  |
| Cl | 0.287317  | -2.460851 | 0.646059  |
| Cl | 0.347738  | 2.350392  | 0.791244  |
| C  | -2.661279 | -1.281675 | 1.496743  |
| H  | -2.473575 | -1.977138 | 0.680239  |
| H  | -3.743828 | -1.166458 | 1.637701  |
| H  | -2.215657 | -1.683052 | 2.408648  |
| C  | -2.406428 | 0.965848  | 2.312409  |
| H  | -2.008652 | 0.561442  | 3.244854  |
| H  | -3.497379 | 1.059314  | 2.390068  |
| H  | -1.966747 | 1.945534  | 2.127677  |

|    |           |           |           |
|----|-----------|-----------|-----------|
| H  | 2.746275  | 0.123866  | -3.594028 |
| C  | 2.896934  | 0.052917  | -2.520499 |
| C  | 3.258118  | -0.143402 | 0.276912  |
| C  | 1.793291  | 0.014766  | -1.654244 |
| C  | 4.185048  | -0.003827 | -1.997981 |
| C  | 4.332142  | -0.101774 | -0.616037 |
| C  | 1.975165  | -0.080231 | -0.244319 |
| H  | 5.063575  | 0.024019  | -2.633072 |
| H  | 3.446050  | -0.216470 | 1.342312  |
| F  | 5.580208  | -0.154402 | -0.109566 |
| C  | 0.417638  | 0.042145  | -2.097906 |
| H  | 0.129507  | 0.097278  | -3.147280 |
| N  | -0.486317 | -0.024893 | -1.175494 |
| Pt | 0.193697  | -0.074761 | 0.707604  |
| N  | -2.069012 | 0.062947  | 1.171208  |
| C  | -2.572200 | 0.618138  | -0.125727 |
| H  | -2.296203 | 1.674228  | -0.148083 |
| H  | -3.665393 | 0.535026  | -0.172206 |
| C  | -1.941198 | -0.082554 | -1.329289 |
| H  | -2.233661 | -1.137218 | -1.377238 |
| H  | -2.240291 | 0.405018  | -2.262374 |
| Cl | 1.016953  | -0.064709 | 2.989380  |
| C  | -2.673735 | -1.255057 | 1.467143  |
| H  | -2.351623 | -1.984105 | 0.725120  |
| H  | -3.769219 | -1.176817 | 1.481715  |
| H  | -2.321670 | -1.589621 | 2.445185  |
| C  | -2.376877 | 1.018634  | 2.259813  |
| H  | -2.041111 | 0.593060  | 3.207042  |
| H  | -3.457311 | 1.210426  | 2.308288  |
| H  | -1.835290 | 1.945601  | 2.067370  |
| O  | 0.114025  | -2.123761 | 0.711805  |
| H  | 0.378516  | -2.393812 | -0.183289 |
| O  | 0.165310  | 1.979818  | 0.705035  |
| H  | 0.638658  | 2.209529  | 1.522702  |

|    |           |           |           |
|----|-----------|-----------|-----------|
| H  | 1.082294  | 2.743600  | -3.433866 |
| C  | 0.766119  | 2.872463  | -2.402732 |
| C  | -0.047304 | 3.179030  | 0.287748  |
| C  | 0.519974  | 1.752262  | -1.598617 |
| C  | 0.609207  | 4.151882  | -1.874069 |
| C  | 0.210183  | 4.273420  | -0.546892 |
| C  | 0.107981  | 1.915282  | -0.249174 |
| H  | 0.791010  | 5.041786  | -2.466465 |
| H  | -0.357682 | 3.345968  | 1.313058  |
| F  | 0.060248  | 5.507700  | -0.030364 |
| C  | 0.678616  | 0.387129  | -2.042376 |
| H  | 1.002322  | 0.125535  | -3.048995 |
| N  | 0.429478  | -0.540926 | -1.181623 |
| Pt | -0.191562 | 0.100603  | 0.627208  |
| N  | -0.396176 | -2.183661 | 0.972550  |
| C  | -0.465241 | -2.678364 | -0.443739 |
| H  | -1.470401 | -2.464351 | -0.813253 |
| H  | -0.314963 | -3.764577 | -0.467806 |
| C  | 0.562282  | -1.989661 | -1.343064 |
| H  | 1.586495  | -2.269385 | -1.073897 |
| H  | 0.395319  | -2.264367 | -2.389408 |
| Cl | -0.923380 | 0.860093  | 2.812037  |
| C  | 0.767409  | -2.768085 | 1.686437  |
| H  | 1.695118  | -2.541719 | 1.161756  |
| H  | 0.646235  | -3.856548 | 1.756392  |
| H  | 0.817687  | -2.339602 | 2.688366  |
| C  | -1.638315 | -2.558134 | 1.692942  |
| H  | -1.560033 | -2.219422 | 2.727292  |
| H  | -1.768965 | -3.647885 | 1.675923  |
| H  | -2.492239 | -2.076098 | 1.217451  |
| O  | 1.670652  | 0.049443  | 1.482699  |
| O  | -2.198714 | 0.126667  | 0.167492  |
| C  | 2.817617  | 0.279411  | 0.903626  |
| C  | -2.758301 | 0.294614  | -0.994684 |
| O  | -2.254587 | 0.366058  | -2.102864 |
| O  | 3.068126  | 0.553306  | -0.254088 |
| C  | 3.939646  | 0.131684  | 1.966390  |
| H  | 3.543272  | -0.039027 | 2.962694  |
| C  | -4.299672 | 0.419042  | -0.892786 |
| H  | -4.715574 | 0.504065  | -1.892829 |
| Cl | -4.756889 | 1.920748  | -0.000654 |
| Cl | -5.043362 | -1.039347 | -0.133497 |
| Cl | 4.961605  | -1.296515 | 1.548314  |
| Cl | 4.924465  | 1.635883  | 2.027369  |

|    |           |           |           |
|----|-----------|-----------|-----------|
| H  | 1.109542  | 2.798754  | -3.427413 |
| C  | 0.786919  | 2.928563  | -2.398450 |
| C  | -0.042196 | 3.237287  | 0.287474  |
| C  | 0.545859  | 1.809031  | -1.591847 |
| C  | 0.616521  | 4.208228  | -1.874987 |
| C  | 0.209951  | 4.330954  | -0.550204 |
| C  | 0.126332  | 1.973839  | -0.244868 |
| H  | 0.793515  | 5.097556  | -2.469599 |
| H  | -0.359541 | 3.404846  | 1.310438  |
| F  | 0.046064  | 5.565341  | -0.039121 |
| C  | 0.720195  | 0.444295  | -2.029597 |
| H  | 1.059514  | 0.181392  | -3.030744 |
| N  | 0.468892  | -0.483547 | -1.167880 |
| Pt | -0.178333 | 0.158674  | 0.632331  |
| N  | -0.416286 | -2.131870 | 0.967051  |
| C  | -0.431241 | -2.625612 | -0.451770 |
| H  | -1.423129 | -2.417705 | -0.859066 |
| H  | -0.274866 | -3.710920 | -0.470537 |
| C  | 0.624263  | -1.932094 | -1.313833 |
| H  | 1.639076  | -2.196738 | -0.997715 |
| H  | 0.505200  | -2.215517 | -2.364257 |
| Cl | -0.925607 | 0.917061  | 2.808069  |
| C  | 0.710150  | -2.728693 | 1.728859  |
| H  | 1.663257  | -2.494489 | 1.256723  |
| H  | 0.583941  | -3.817742 | 1.777191  |
| H  | 0.709915  | -2.315832 | 2.738760  |
| C  | -1.692754 | -2.497233 | 1.632104  |
| H  | -1.664662 | -2.146479 | 2.665138  |
| H  | -1.822005 | -3.587112 | 1.621174  |
| H  | -2.523790 | -2.023201 | 1.110503  |
| O  | 1.675169  | 0.059362  | 1.489853  |
| O  | -2.168836 | 0.170194  | 0.146020  |
| C  | 2.820507  | 0.330262  | 0.937330  |
| C  | -2.725693 | 0.304073  | -1.021219 |
| O  | -2.244124 | 0.469713  | -2.124313 |
| O  | 3.094616  | 0.743334  | -0.171833 |
| C  | 3.955399  | -0.011968 | 1.942984  |
| C  | -4.265742 | 0.183693  | -0.845519 |
| F  | -4.901709 | 0.395519  | -2.004259 |
| F  | -4.725760 | 1.070880  | 0.056698  |
| F  | -4.590123 | -1.053432 | -0.409658 |
| F  | 5.137584  | 0.437513  | 1.502648  |
| F  | 4.046107  | -1.352103 | 2.089887  |
| F  | 3.727910  | 0.521924  | 3.157451  |

**Cl(H<sub>2</sub>O)<sub>3</sub><sup>-</sup>**

10

|    |           |           |           |
|----|-----------|-----------|-----------|
| Cl | 0.854094  | 0.022520  | 0.302969  |
| H  | -0.236077 | -1.854916 | 1.062800  |
| H  | -0.232361 | 1.897367  | 1.073681  |
| H  | 0.849314  | 0.026430  | -1.995949 |
| O  | -0.695221 | -2.657923 | 1.386832  |
| H  | -0.780322 | -2.488117 | 2.337904  |
| O  | -0.694802 | 2.696686  | 1.402176  |
| H  | -0.783063 | 3.237816  | 0.602651  |
| O  | 0.854338  | 0.032053  | -2.976060 |
| H  | 0.864100  | -0.911915 | -3.197005 |

**OH(H<sub>2</sub>O)<sub>3</sub><sup>-</sup>**

11

|   |           |           |           |
|---|-----------|-----------|-----------|
| H | -0.744151 | 0.357778  | -1.145410 |
| O | -0.167586 | 0.393310  | -0.364794 |
| H | -0.941482 | -0.735697 | 0.612863  |
| H | 0.763980  | -0.895431 | -0.589144 |
| H | 0.043552  | 1.999107  | -0.209311 |
| O | -1.180704 | -1.607090 | 1.055099  |
| H | -0.482654 | -2.154555 | 0.651887  |
| O | 1.238522  | -1.801380 | -0.631241 |
| H | 1.833630  | -1.766868 | 0.134615  |
| O | 0.131739  | 3.004975  | -0.112698 |
| H | -0.494847 | 3.205851  | 0.598134  |

**DCA(H<sub>2</sub>O)<sub>3</sub><sup>-</sup>**

16

|    |           |           |           |
|----|-----------|-----------|-----------|
| C  | -0.418657 | 0.336495  | -1.082774 |
| O  | -0.658091 | 0.111268  | -2.279266 |
| C  | -0.146595 | 1.810347  | -0.636949 |
| H  | -0.462210 | 1.984548  | 0.388576  |
| Cl | -0.990246 | 3.033159  | -1.659443 |
| Cl | 1.650288  | 2.097913  | -0.662947 |
| O  | -0.331483 | -0.491948 | -0.123195 |
| H  | -0.765491 | -2.344429 | -0.988920 |
| H  | 1.513184  | -1.012151 | 0.647402  |
| H  | -0.347163 | 0.104700  | 1.585504  |
| O  | 2.105239  | -1.007159 | 1.422224  |
| H  | 1.554202  | -0.505752 | 2.056204  |
| O  | -0.102018 | 0.464401  | 2.471563  |
| H  | -0.649279 | -0.040528 | 3.094874  |
| O  | -0.993478 | -2.693193 | -1.870732 |
| H  | -0.958200 | -1.847670 | -2.362121 |



**TFA(H<sub>2</sub>O)<sub>3</sub><sup>-</sup>**

16

|   |           |           |           |
|---|-----------|-----------|-----------|
| C | 0.722154  | 0.767794  | -1.914737 |
| F | -0.190031 | 1.769920  | -1.846081 |
| F | 1.790288  | 1.154330  | -1.176269 |
| F | 1.131120  | 0.687048  | -3.194754 |
| C | 0.104455  | -0.560699 | -1.385953 |
| O | -0.148285 | -1.440854 | -2.211344 |
| O | -0.096690 | -0.545472 | -0.128022 |
| H | 1.143526  | 0.155157  | 1.099546  |
| H | -0.998286 | 1.052798  | 0.654127  |
| H | -1.017588 | -1.949817 | 0.545595  |
| O | -1.054732 | 1.727648  | 1.357002  |
| H | -0.186510 | 1.589720  | 1.786830  |
| O | -1.551105 | -2.652296 | 0.984354  |
| H | -2.455919 | -2.309617 | 0.918651  |
| O | 1.511645  | 0.590469  | 1.900483  |
| H | 1.295957  | -0.036128 | 2.610572  |
